# Supplementary material
Source: publisher site journal article supplement (https://www.dovepress.com/article/425218)
Supplement: Supplementary file 1 [file get_supplementary_file.php]

Supplementary Table 1. Search strategy

| **Category 1** | **Category 2** | **Category 3** |
| --- | --- | --- |
| Telehealth pulmonary rehabilitation | Chronic obstructive pulmonary disease | Effect |
| Telerehabilitation | Chronic bronchitis | Effectiveness |
| Home-based training | Emphysema | Results |
| Home-based rehabilitation |  | Efficacy |
| Home-based pulmonary rehabilitation |  | Efficiency |
| Home-based respiratory training |  | Benefit |
| Mobile health pulmonary rehabilitation |  |  |

Systematic searches via literature databases were conducted by combining the search terms of all categories.

Supplementary Table 2. The results of the assessment of study quality and reporting in exercise

|  | Study Quality (Max. 5) | Study Reporting  (Max. 10) | Total Score (Max. 15) |
| --- | --- | --- | --- |
| Galdiz (2020) (16) | 3 | 6 | 9 |
| Chaplin (2017) (17) | 3 | 5 | 8 |
| Demeyer (2017) (18) | 4 | 7 | 11 |
| Vasilopoulou (2017) (19) | 3 | 7 | 10 |
| Vorrink (2016) (20) | 4 | 6 | 10 |
| Moy (2015) (21) | 4 | 9 | 13 |
| Moy (2016) (22) | 4 | 6 | 10 |
| Wang (2014) (23) | 2 | 4 | 6 |
| Tabak (2014) (15) | 3 | 5 | 8 |
| Liu (2008) (24) | 3 | 6 | 9 |
| Mean | 3.3 | 6.1 | 9.4 |
| Range | 2 - 4 | 4 - 9 | 6 - 13 |

Max: Maximum.
